# Supplementary material for: SARS-CoV-2 variant exposures elicit antibody responses with differential cross-neutralization of established and emerging strains including Delta and Omicron
Source: bioRxiv or medRxiv preprint supplement (doi:10.1101/2021.09.08.21263095), 2021-12-22
Supplement: Supplementary file [file media-1.pdf]

**Table S1. Characteristics of study subjects**

| Donor exposure(s)              | Natural infection |             |            |            | mRNA vaccine     |                   | Natural infection plus mRNA vaccine |                    |
|--------------------------------|-------------------|-------------|------------|------------|------------------|-------------------|-------------------------------------|--------------------|
|                                | D614G             | B.1.429     | B.1.1.519  | E484K      | BNT162b2 vaccine | mRNA-1273 vaccine | D614G + BNT162b2                    | B.1.429 + BNT162b2 |
| <b>Count</b>                   | n = 10            | n = 15      | n = 6      | n = 2      | n = 5            | n = 6             | n = 8                               | n = 17             |
| <b>Mean age (SD)</b>           | 48.8 (12.6)       | 42.0 (11.2) | 37.5 (7.3) | 32.5 (2.1) | 32.4 (11.3)      | 29.8 (6.9)        | 43.9 (12.3)                         | 40.5 (9.2)         |
| <b>Sex</b>                     |                   |             |            |            |                  |                   |                                     |                    |
| Female (%)                     | 5 (50%)           | 10 (66.7%)  | 4 (66.7%)  | 0 (0%)     | 4 (66.6%)        | 2 (40%)           | 1 (12.5%)                           | 9 (52.9%)          |
| Male (%)                       | 5 (50%)           | 5 (33.3%)   | 2 (33.3%)  | 2 (100%)   | 2 (33.3%)        | 3 (60%)           | 7 (87.5%)                           | 8 (47.1%)          |
| <b>Symptoms</b>                |                   |             |            |            |                  |                   |                                     |                    |
| Yes (%)                        | 8 (80.0%)         | 9 (60.0%)   | 4 (66.7%)  | 2 (100%)   |                  |                   | 5 (62.5%)                           | 9 (52.9%)          |
| No (%)                         | 2 (20.0%)         | 5 (33.3%)   | 2 (33.3%)  | 0 (0.0%)   |                  |                   | 2 (25.0%)                           | 7 (41.2%)          |
| Unknown (%)                    | 0 (0.0%)          | 1 (6.7%)    | 0 (0.0%)   | 0 (0.0%)   |                  |                   | 1 (12.5%)                           | 1 (5.9%)           |
| <b>Days post COVID19+ (SD)</b> | 56 (19.1)         | 38.7 (6.1)  | 38.5 (8.9) | 36 (11.3)  |                  |                   | 116 (11.2)                          | 107.1 (13.2)       |
| <b>Days post vaccine (SD)</b>  |                   |             |            |            | 16 (2.8)         | 35 (13.3)         | 19.5 (6.9)                          | 28.4 (13.1)        |
